# Supplementary material
Source: PubMed Central journal article supplement (PMC3346017)
Supplement: 97320630008394S1.pdf [file 97320630008394S1.pdf]

## Supplementary material:

**Table 1:** Performance of SVM models based on various features

| <b>Bacterial Lipoproteins</b>     | <b>Kernel</b> | <b>10 Fold Cross Validation</b> |
|-----------------------------------|---------------|---------------------------------|
| Amino acid                        | RBF           | 90%                             |
| Selected amino acid               | RBF           | 91%                             |
| Dipeptide                         | RBF           | 94%                             |
| <b>Selected Dipeptide</b>         | <b>RBF</b>    | <b>97% - SVM MODEL</b>          |
| Amino acid and dipeptide          | RBF           | 93%                             |
| Selected amino acid and dipeptide | RBF           | 96%                             |
